# Supplementary material for: Polyacrylamide exotemplate-assisted synthesis of hierarchically porous nanostructured TiO2macrobeads for efficient photodegradation of organic dyes and microbes
Source: Royal Society of Chemistry journal article supplement (doi:10.1039/c8ra06197a), 2018-01-01
Supplement: c8ra06197a1.pdf [file c8ra06197a1.pdf]

## Supporting Information

### **Polyacrylamide exotemplate-assisted synthesis of hierarchically porous nanostructured TiO<sub>2</sub> macrobeads for efficient photodegradation of organic dyes and microbes**

Muhammad Ahmad Mudassir,<sup>†,‡,§</sup> Syed Zajif Hussain,<sup>†</sup> Mishal Khan,<sup>‡</sup> Syeda Tasmia Asma,<sup>†,¶</sup> Zafar Iqbal,<sup>†</sup> Zille Huma,<sup>†</sup> Najeeb Ullah,<sup>¥</sup> Haifei Zhang,<sup>§</sup> Tariq Mahmood Ansari,<sup>\*,‡</sup> and Irshad Hussain<sup>\*,†,¥</sup>

<sup>†</sup>Department of Chemistry & Chemical Engineering, SBA School of Science & Engineering (SBASSE), Lahore University of Management Sciences (LUMS), Lahore - 54792, Pakistan

<sup>‡</sup>Institute of Chemical Sciences, Bahauddin Zakariya University (BZU), Multan - 60800, Pakistan

<sup>§</sup>Department of Chemistry, University of Liverpool, Oxford Street, Liverpool - L69 3BX, U.K.

<sup>¶</sup>Institute of Industrial Biotechnology (IIB), GC University Lahore - 54000, Pakistan

<sup>‡</sup>Preston Institute of Nano Science & Technology (PINSAT), Islamabad, Pakistan

<sup>¥</sup>US-Pakistan Center for Advanced Studies in Energy (USPCAS-E), University of Engineering & Technology (UET), Peshawar, Pakistan

\*Corresponding authors' email addresses: [ihussain@lums.edu.pk](mailto:ihussain@lums.edu.pk); [drtariq2000@gmail.com](mailto:drtariq2000@gmail.com)

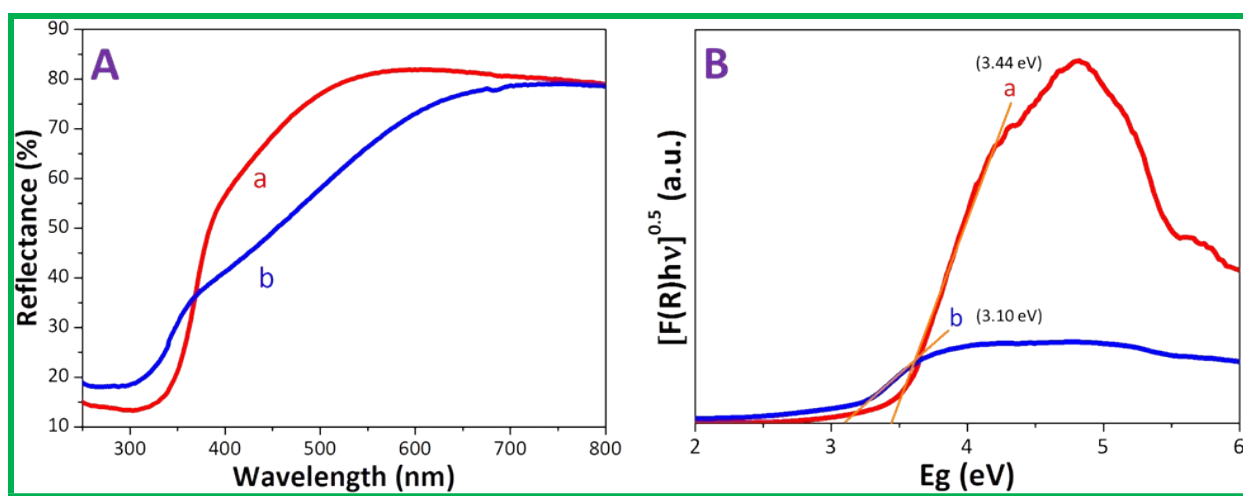

**Figure S1.** (A) UV-vis diffuse reflectance spectra and (B) plot of Kubelka-Munk function  $(F(R)hv^{0.5})$  versus photon energy ( $E_g$ ) for the bandgap measurement of (a) PAM-TiO<sub>2</sub> NC, and (b) porous NS TiO<sub>2</sub> macrobeads.

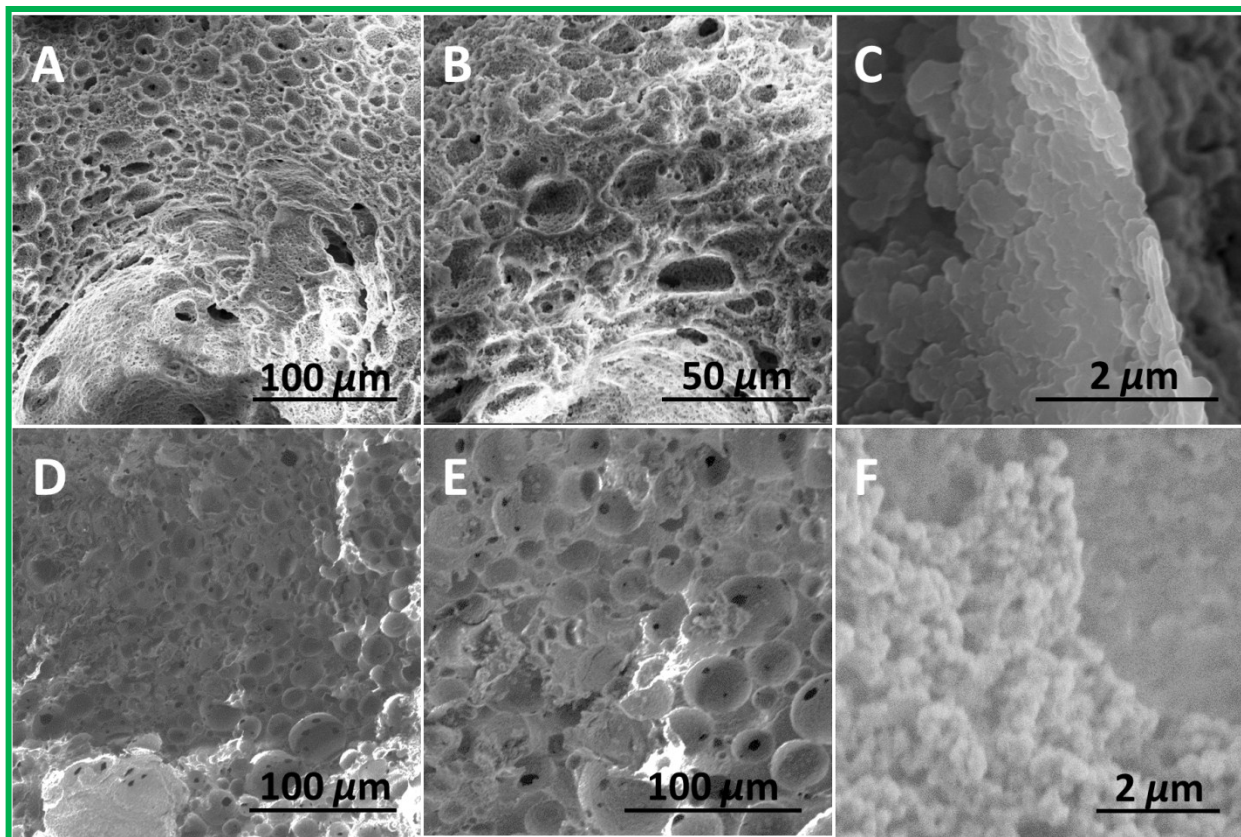

**Figure S2.** SEM images (cross-sectional view) of (A–C) PAM showing greater macroporosity, (D–F) PAM–TiO<sub>2</sub> NC macrobeads showing (D,E) blocked pores and (F) TiO<sub>2</sub> particles.

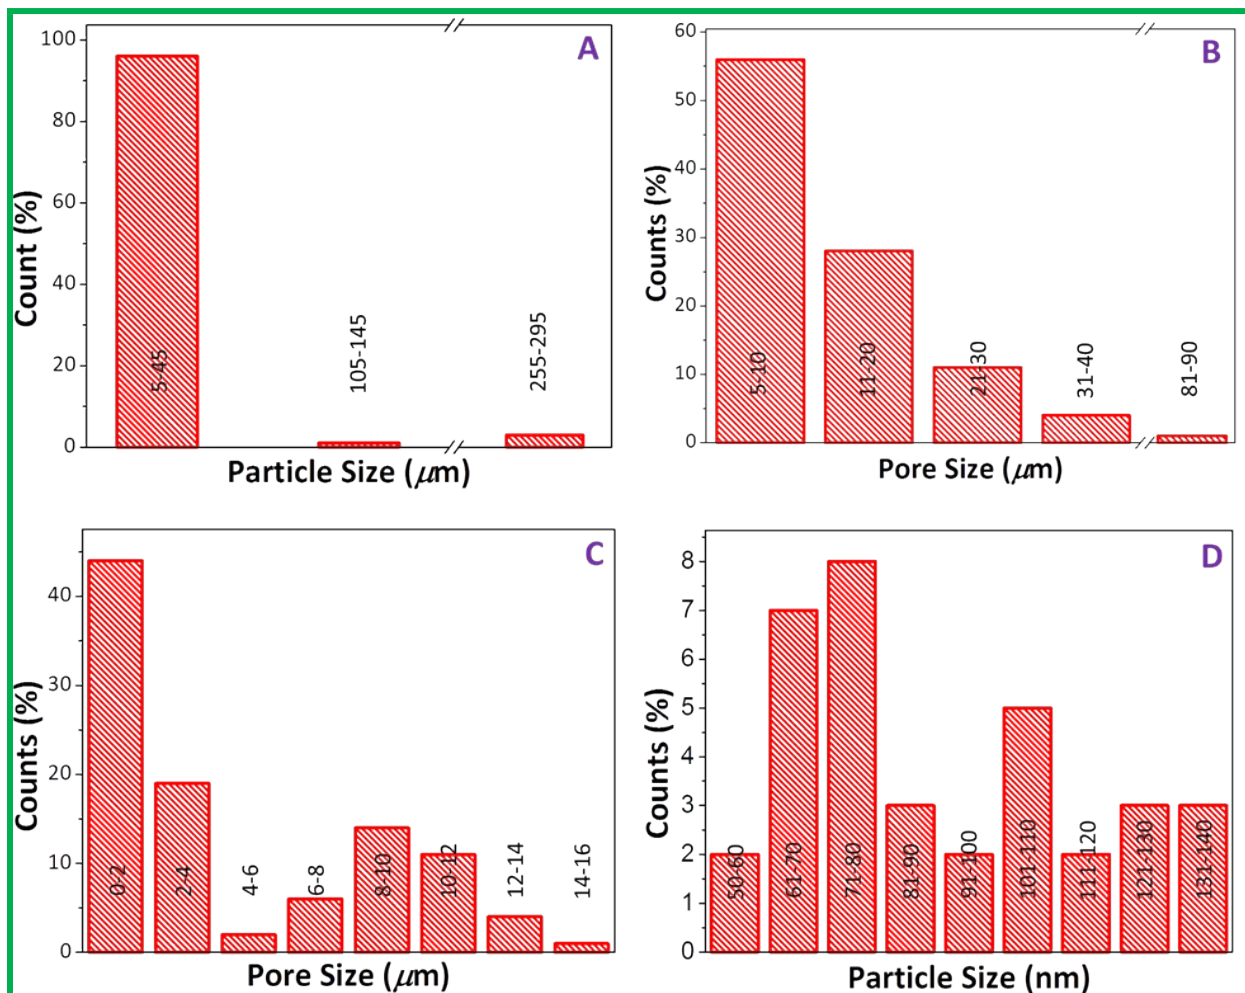

**Figure S3.** Pore size distribution of (A) PAM, (B) PAM-TiO<sub>2</sub> NC and (C) porous NS TiO<sub>2</sub> macrobeads. (D) Particle size distribution of TiO<sub>2</sub> nanobuilding blocks. ImageJ software was used to measure the average pore size distribution of beads and particle size of TiO<sub>2</sub> nanobuilding units (NBUs).

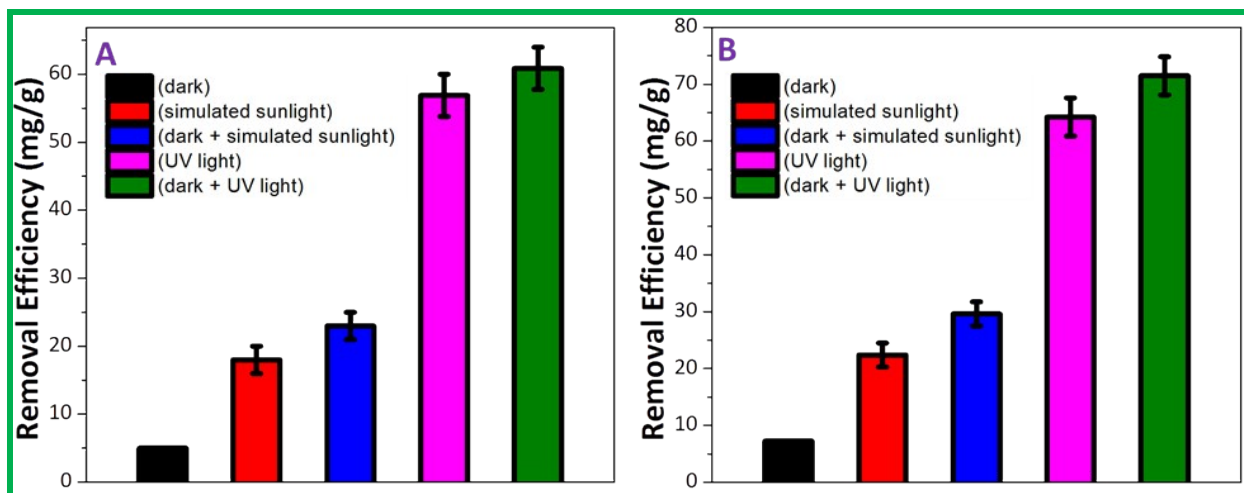

Figure S4. Removal efficiency (mg/g) of porous NS TiO<sub>2</sub> macrobeads (A) without H<sub>2</sub>O<sub>2</sub>, and (B) with H<sub>2</sub>O<sub>2</sub>.

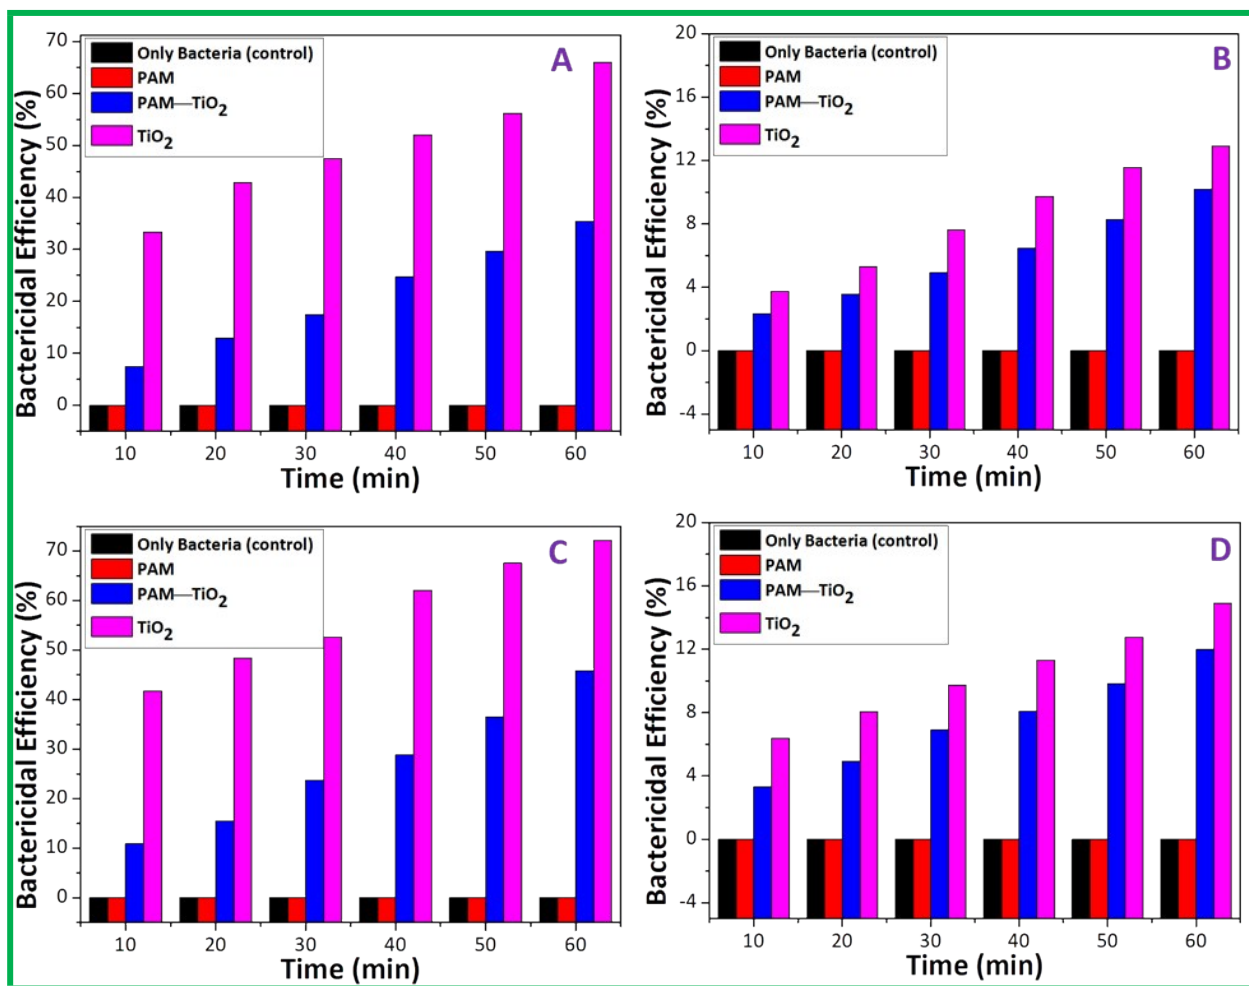

**Figure S5.** Time-wise bactericidal efficiencies (%) of 0.2 mg/mL dosage of PAM, PAM-TiO<sub>2</sub> NC and porous NS TiO<sub>2</sub> macrobeads against *S. aureus* under (A) UV light and in the (B) dark, and against *E. coli* under (C) UV light and in the (D) dark.

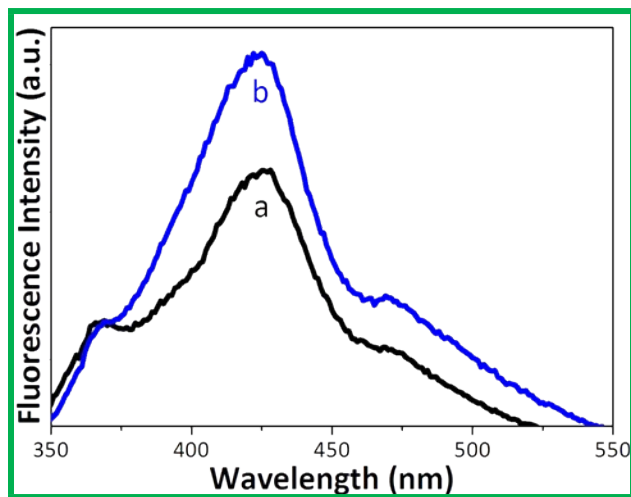

**Figure S6.** Fluorescence spectra of the irradiated (a) TA (without TiO<sub>2</sub>) and TA with TiO<sub>2</sub> samples.

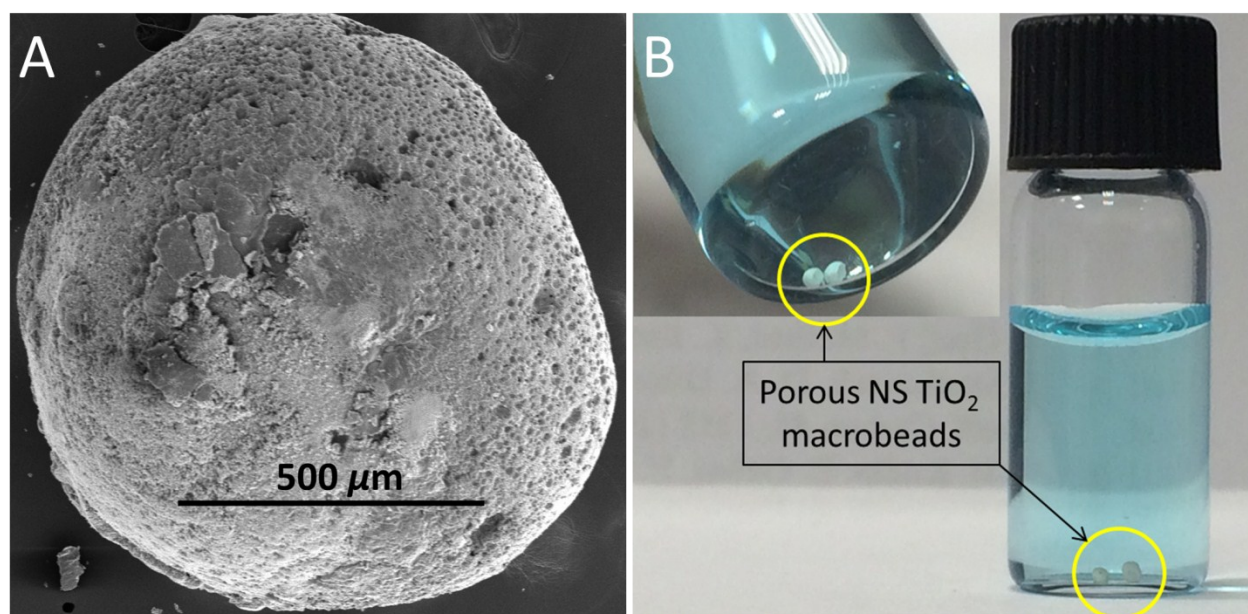

**Figure S7.** SEM image of a single NS TiO<sub>2</sub> macrobead. (B) Digital photograph of the NS TiO<sub>2</sub> macrobeads (zoomed-in view in the inset) showing their integrity in MB aqueous solution.



**Table S1.** A comparison for the removal of methylene blue by different TiO<sub>2</sub>-based materials.

| Material                                                                    | Removal Efficiency           | $k$ (min <sup>-1</sup> ) | Operational Parameters |                      |          |     | Ref.       |
|-----------------------------------------------------------------------------|------------------------------|--------------------------|------------------------|----------------------|----------|-----|------------|
|                                                                             |                              |                          | mg of Catalyst         | MB Conc.             | mL of MB | min |            |
| commercial TiO <sub>2</sub> powders                                         | 48.2%                        | —                        | 15                     | 20 ppm               | 50       | 70  | 1          |
| CdSe-TiO <sub>2</sub> nanocrystals                                          | 67%                          | 0.004                    | 9                      | 10 ppm               | 100      | 60  | 2          |
| TiO <sub>2</sub> -polymer nanofibers                                        | 70%                          | —                        | —                      | 1×10 <sup>-5</sup> M | 200      | 180 | 3          |
| TiO <sub>2</sub> -based coatings                                            | 71.5%                        | —                        | 10                     | 2×10 <sup>-5</sup> M | 10       | 180 | 4          |
| Ag NPs loaded TiO <sub>2</sub> NTs                                          | 81.2%                        | —                        | 20                     | 20 ppm               | 60       | 150 | 5          |
| PoPD/TiO <sub>2</sub> NCs                                                   | 85.9%                        | 0.010                    | 30                     | 10 ppm               | 30       | 180 | 6          |
| commercial TiO <sub>2</sub> NPs                                             | 90%                          | 0.025                    | 150                    | 150 ppm              | 300      | 360 | 7          |
| anatase nano-TiO <sub>2</sub>                                               | 90.3%                        | 0.035                    | 50                     | 4×10 <sup>-5</sup> M | 100      | 60  | 8          |
| TiO <sub>2</sub> hollow microspheres                                        | 92%                          | —                        | 100                    | 15 ppm               | 500      | 360 | 9          |
| TiO <sub>2</sub> @rGO NCs                                                   | 92%                          | 0.018                    | 200                    | —                    | 5        | 120 | 10         |
| Ag@Fe <sub>3</sub> O <sub>4</sub> @SiO <sub>2</sub> @TiO <sub>2</sub>       | 95%<br>51 mg/g               | —                        | 10                     | 50 ppm               | 20       | 240 | 11         |
| JHP-TiO <sub>2</sub> -Au microswimmer                                       | 97%                          | —                        | 1                      | 10 <sup>-6</sup> M   | —        | 60  | 12         |
| chargeable TiO <sub>2</sub> NPs                                             | 97%                          | 0.018                    | 100                    | 10 ppm               | 600      | 180 | 13         |
| electrospun fiber embedding TiO <sub>2</sub> [(EPF(2/1)-TiO <sub>2</sub> )] | 97% (total)                  | 0.045<br>0.050           | —                      | 20 μM<br>10 μM       | —        | 330 | 14         |
| porous TiO <sub>2</sub> nanowires                                           | 97.98%                       | —                        | 15                     | 20 ppm               | 50       | 56  | 15         |
| aerochitin-TiO <sub>2</sub> composite                                       | 98%                          | 0.018                    | 10                     | 10 ppm               | 10       | 200 | 16         |
| NS TiO <sub>2</sub> macrobeads (without H <sub>2</sub> O <sub>2</sub> )     | 86.87% (total)<br>60.89 mg/g | 0.030                    | 5<br>3                 | 25 ppm               | 10       | 60  | This study |
| NS TiO <sub>2</sub> macrobeads (with H <sub>2</sub> O <sub>2</sub> )        | 98.53% (total)<br>64.24 mg/g | 0.050                    | 5<br>3                 | 25 ppm               | 10       | 60  |            |

Total means the cumulative efficiency achieved under both the dark and UV light conditions;  $K$  is the reaction rate constant; MB stands for methylene blue; conc. stands for concentration; ref. stands for references; NTs, NPs, NCs and NS stand for nanotubes, nanoparticles, nanocomposites and nanostructured, respectively.

## References

1. J. Huang, H. Ren, X. Liu, X. Li and J.-J. Shim, *Superlattices Microstruct.*, 2015, **81**, 16-25.
2. I. A. Mir, I. Singh, B. Birajdar and K. Rawat, *Water Conserv. Sci. Eng.*, 2017, **2**, 43-50.
3. A. Abdal-hay, A. S. Hamdy Makhlouf and K. A. Khalil, *ACS Appl. Mater. Interfaces*, 2015, **7**, 13329-13341.
4. F. Xu, T. Wang, H. Chen, J. Bohling, A. M. Maurice, L. Wu and S. Zhou, *Prog. Org. Coat.*, 2017, **113**, 15-24.
5. P. Van Viet, B. T. Phan, D. Mott, S. Maenosono, T. T. Sang and C. M. Thi, *J. Photochem. Photobiol., A*, 2018, **352**, 106-112.
6. C. Yang, M. Zhang, W. Dong, G. Cui, Z. Ren and W. Wang, *PloS one*, 2017, **12**, e0174104.
7. M. Subramaniam, P. Goh, N. Abdullah, W. Lau, B. Ng and A. Ismail, *J. Nanopart. Res.*, 2017, **19**, 220.
8. J. Zhang, B. Wu, L. Huang, P. Liu, X. Wang, Z. Lu, G. Xu, E. Zhang, H. Wang and Z. Kong, *J. Alloy. Compd.*, 2016, **661**, 441-447.
9. J. H. Pan, X. Zhang, A. J. Du, D. D. Sun and J. O. Leckie, *J. Am. Chem. Soc.*, 2008, **130**, 11256-11257.
10. M. Sohail, H. Xue, Q. Jiao, H. Li, K. Khan, S. Wang and Y. Zhao, *Mater. Res. Bull.*, 2017, **90**, 125-130.
11. J. Su, Y. Zhang, S. Xu, S. Wang, H. Ding, S. Pan, G. Wang, G. Li and H. Zhao, *Nanoscale*, 2014, **6**, 5181-5192.
12. V. Sridhar, B. W. Park and M. Sitti, *Adv. Funct. Mater.*, 2018, **28**, 1704902.
13. F. Azeez, E. Al-Hetlani, M. Arafa, Y. Abdelmonem, A. A. Nazeer, M. O. Amin and M. Madkour, *Sci Rep.*, 2018, **8**, 7104.
14. C.-G. Lee, H. Javed, D. Zhang, J.-H. Kim, P. Westerhoff, Q. Li and P. J. Alvarez, *Environ. Sci. Technol.*, 2018, **52**, 4285-4293.
15. Y. Tang, H. Ren and J. Huang, *Front. Optoelectron.*, 2017, **10**, 395-401.
16. R. S. Dassanayake, E. Rajakaruna and N. Abidi, *J. Appl. Polym. Sci.*, 2018, **135**, 45908.
